# Supplementary material
Source: PubMed Central journal article supplement (PMC3752697)
Supplement: NIHMS496059-supplement-Supplementary_Table.pdf [file NIHMS496059-supplement-Supplementary_Table.pdf]

**Supplemental Table 1. Symptoms and Themes of Patients with CMT1A**

| Symptom                                              | Total Number of Quotes | Total Number of Patients | Theme                             |
|------------------------------------------------------|------------------------|--------------------------|-----------------------------------|
| <b>PHYSICAL HEALTH</b>                               |                        |                          |                                   |
| Hand weakness                                        | 13                     | 7                        | Hand and Finger Weakness          |
| Decreased dexterity                                  | 9                      | 6                        | Hand and Finger Weakness          |
| Weak grasp                                           | 7                      | 5                        | Hand and Finger Weakness          |
| Dropping objects with hands                          | 7                      | 6                        | Hand and Finger Weakness          |
| Difficulty manipulating small objects                | 4                      | 5                        | Hand and Finger Weakness          |
| Difficulty opening jars or bottles                   | 3                      | 2                        | Hand and Finger Weakness          |
| Difficulty opening hands                             | 2                      | 2                        | Hand and Finger Weakness          |
| Difficulty opening clasps on chains                  | 2                      | 1                        | Hand and Finger Weakness          |
| Difficulty holding a pen                             | 2                      | 2                        | Hand and Finger Weakness          |
| Decreased hand dexterity after being in cold weather | 2                      | 1                        | Hand and Finger Weakness          |
| Hand tremor                                          | 1                      | 1                        | Hand and Finger Weakness          |
| Clumsy with hands                                    | 1                      | 1                        | Hand and Finger Weakness          |
| Increased hand weakness when tired                   | 1                      | 1                        | Hand and Finger Weakness          |
| Trouble turning objects with hands                   | 1                      | 1                        | Hand and Finger Weakness          |
| <b>Subtotal for theme</b>                            | <b>55</b>              |                          |                                   |
| Decreased ability to carry a heavy load with arms    | 4                      | 3                        | Proximal Upper Extremity Weakness |
| Arm weakness                                         | 1                      | 1                        | Proximal Upper Extremity Weakness |
| Shoulder weakness                                    | 1                      | 1                        | Proximal Upper Extremity Weakness |
| <b>Subtotal for theme</b>                            | <b>6</b>               |                          |                                   |
| Requirement for ankle foot orthoses (AFO)            | 6                      | 6                        | Foot Weakness                     |
| Foot drop                                            | 5                      | 4                        | Foot Weakness                     |
| Ankle weakness                                       | 5                      | 4                        | Foot Weakness                     |
| Foot weakness                                        | 4                      | 4                        | Foot Weakness                     |
| The need for orthotic shoes                          | 3                      | 3                        | Foot Weakness                     |
| Required ankle surgery                               | 1                      | 1                        | Foot Weakness                     |
| <b>Subtotal for theme</b>                            | <b>24</b>              |                          |                                   |
| Leg weakness                                         | 2                      | 2                        | Leg Weakness                      |
| Difficulty getting up from the floor or ground       | 2                      | 2                        | Leg Weakness                      |
| Difficulty getting up from lying down                | 2                      | 1                        | Leg Weakness                      |
| Difficulty rising from a seated position             | 2                      | 2                        | Leg Weakness                      |
| <b>Subtotal for theme</b>                            | <b>8</b>               |                          |                                   |
| Impaired walking                                     | 26                     | 13                       | Mobility and Ambulation           |
| Falls                                                | 18                     | 10                       | Mobility and Ambulation           |
| Tripping                                             | 16                     | 13                       | Mobility and Ambulation           |
| Inability to run                                     | 11                     | 10                       | Mobility and Ambulation           |
| Difficulty with rough ground                         | 10                     | 9                        | Mobility and Ambulation           |
| Difficulty walking long distances                    | 10                     | 6                        | Mobility and Ambulation           |

|                                            |            |   |                         |
|--------------------------------------------|------------|---|-------------------------|
| Difficulty going upstairs                  | 10         | 6 | Mobility and Ambulation |
| Decreased mobility                         | 8          | 4 | Mobility and Ambulation |
| Difficulty moving quickly                  | 6          | 5 | Mobility and Ambulation |
| The need for railing on stairs             | 6          | 5 | Mobility and Ambulation |
| Difficulty going downstairs                | 6          | 4 | Mobility and Ambulation |
| Need to be cautious walking                | 6          | 4 | Mobility and Ambulation |
| Difficulty running                         | 4          | 4 | Mobility and Ambulation |
| Difficulty standing                        | 4          | 3 | Mobility and Ambulation |
| The need for assistive devices (cane, etc) | 4          | 3 | Mobility and Ambulation |
| Difficulty with ambulation                 | 4          | 1 | Mobility and Ambulation |
| Having to look at feet with walking        | 2          | 2 | Mobility and Ambulation |
| Can't keep pace with friends               | 2          | 2 | Mobility and Ambulation |
| Difficult walking in sand                  | 2          | 2 | Mobility and Ambulation |
| Fracture from falls                        | 2          | 2 | Mobility and Ambulation |
| Decreased coordination of legs             | 2          | 1 | Mobility and Ambulation |
| Trouble with hills                         | 2          | 1 | Mobility and Ambulation |
| Loss of stability when walking             | 2          | 1 | Mobility and Ambulation |
| Sense that walking is uneven               | 1          | 1 | Mobility and Ambulation |
| Need to lift legs higher while walking     | 1          | 1 | Mobility and Ambulation |
| Difficulty getting up quickly              | 1          | 1 | Mobility and Ambulation |
| Trouble getting around when it is slippery | 1          | 1 | Mobility and Ambulation |
| Stubbing of toes                           | 1          | 1 | Mobility and Ambulation |
| <b>Subtotal for theme</b>                  | <b>168</b> |   |                         |

### MENTAL HEALTH

|                                           |          |   |                      |
|-------------------------------------------|----------|---|----------------------|
| Cognitive Impairment                      | 0        | 0 | Cognitive Impairment |
| <b>Subtotal for theme</b>                 | <b>0</b> |   |                      |
| Fear of disease progression               | 15       | 9 | Emotional Distress   |
| Depression                                | 8        | 8 | Emotional Distress   |
| Anxiety                                   | 6        | 6 | Emotional Distress   |
| Frustration                               | 9        | 6 | Emotional Distress   |
| Fear of falling                           | 7        | 6 | Emotional Distress   |
| Moodiness                                 | 3        | 3 | Emotional Distress   |
| Fear                                      | 2        | 2 | Emotional Distress   |
| Self pity                                 | 2        | 2 | Emotional Distress   |
| Awareness of disease progression          | 2        | 2 | Emotional Distress   |
| Fear of injury from sports                | 2        | 2 | Emotional Distress   |
| Anxiety about going places to do things   | 2        | 2 | Emotional Distress   |
| Damaged pride with loss of independence   | 1        | 1 | Emotional Distress   |
| Fear of stairs                            | 1        | 1 | Emotional Distress   |
| Fear of escalators                        | 1        | 1 | Emotional Distress   |
| Fear of an inability to perform job       | 1        | 1 | Emotional Distress   |
| Embarrassment                             | 1        | 1 | Emotional Distress   |
| Anger                                     | 2        | 1 | Emotional Distress   |
| Fear of injury or death while being alone | 2        | 1 | Emotional Distress   |
| Sadness                                   | 1        | 1 | Emotional Distress   |
| Hopelessness                              | 0        | 0 | Emotional Distress   |
| Grief                                     | 0        | 0 | Emotional Distress   |

|                                                            |           |   |                              |
|------------------------------------------------------------|-----------|---|------------------------------|
| Fear of being trapped in a burning building                | 1         |   | Emotional Distress           |
| <b>Subtotal for theme</b>                                  | <b>69</b> |   |                              |
| Embarrassment of gait                                      | 5         | 3 | Body Image                   |
| Embarrassment of braces                                    | 4         | 2 | Body Image                   |
| Loss of hand muscle                                        | 4         | 3 | Body Image                   |
| Clothing Restriction due to Braces                         | 3         | 3 | Body Image                   |
| Feeling different from other people                        | 3         | 3 | Body Image                   |
| Loss of leg muscle                                         | 3         | 3 | Body Image                   |
| Weight gain because can't exercise                         | 2         | 2 | Body Image                   |
| Embarrassment of feet                                      | 1         | 1 | Body Image                   |
| Loss of foot muscle                                        | 1         | 1 | Body Image                   |
| Scoliosis                                                  | 1         | 1 | Body Image                   |
| <b>Subtotal for theme</b>                                  | <b>27</b> |   |                              |
| <b>SOCIAL HEALTH</b>                                       |           |   |                              |
| Lack of understanding of CMT by others                     | 6         | 4 | Social Role Limitations      |
| Reliance on family members                                 | 6         | 4 | Social Role Limitations      |
| Impaired job performance                                   | 5         | 5 | Social Role Limitations      |
| Lack of job secondary to disability                        | 4         | 4 | Social Role Limitations      |
| Unable to live in certain places                           | 3         | 3 | Social Role Limitations      |
| Unable to go places                                        | 3         | 3 | Social Role Limitations      |
| Inability to do physical things other people can do        | 2         | 2 | Social Role Limitations      |
| Having to be cautious when going places                    | 2         | 2 | Social Role Limitations      |
| Braces limit job opportunity                               | 1         | 1 | Social Role Limitations      |
| Inability to go out                                        | 1         | 1 | Social Role Limitations      |
| Impaired sexual function                                   | 1         | 1 | Social Role Limitations      |
| Difficulty helping with family chores                      | 1         | 1 | Social Role Limitations      |
| Unable to lift children                                    | 1         | 1 | Social Role Limitations      |
| <b>Subtotal for theme</b>                                  | <b>36</b> |   |                              |
| Unable to participate in fun activities                    | 7         | 7 | Social Role Dissatisfaction  |
| Dissatisfied with social interactions                      | 6         | 4 | Social Role Dissatisfaction  |
| Social isolation                                           | 6         | 5 | Social Role Dissatisfaction  |
| Impaired interaction with family members                   | 5         | 4 | Social Role Dissatisfaction  |
| Concern about being judged by others                       | 3         | 2 | Social Role Dissatisfaction  |
| Feeling excluded                                           | 3         | 3 | Social Role Dissatisfaction  |
| Impaired interactions with friends                         | 3         | 3 | Social Role Dissatisfaction  |
| Discrimination at work                                     | 2         | 2 | Social Role Dissatisfaction  |
| Difficulty with others who don't understand my limitations | 2         | 1 | Social Role Dissatisfaction  |
| Difficulty getting around in large crowds                  | 1         | 1 | Social Role Dissatisfaction  |
| <b>Subtotal for theme</b>                                  | <b>38</b> |   |                              |
| <b>CMT1A SPECIFIC ISSUES</b>                               |           |   |                              |
| Inability to play sports                                   | 13        | 9 | Specific Activity Impairment |
| Increased time to complete an activity                     | 7         | 6 | Specific Activity Impairment |
| Decreased ability to button                                | 6         | 5 | Specific Activity Impairment |
| Difficulty cooking                                         | 6         | 5 | Specific Activity Impairment |

|                                            |           |    |                              |
|--------------------------------------------|-----------|----|------------------------------|
| Trouble taking care of the home            | 6         | 5  | Specific Activity Impairment |
| Increased planning to complete an activity | 6         | 3  | Specific Activity Impairment |
| Difficulty cleaning the house              | 4         | 3  | Specific Activity Impairment |
| Difficulty dancing                         | 3         | 3  | Specific Activity Impairment |
| Decreased ability to use zippers           | 3         | 3  | Specific Activity Impairment |
| Difficulty using a ladder                  | 3         | 2  | Specific Activity Impairment |
| The inability to go certain places         | 3         | 3  | Specific Activity Impairment |
| Trouble opening bottles                    | 2         | 1  | Specific Activity Impairment |
| Difficulty typing                          | 2         | 2  | Specific Activity Impairment |
| Difficulty swimming                        | 2         | 2  | Specific Activity Impairment |
| Impaired ability to exercise               | 2         | 1  | Specific Activity Impairment |
| Difficulty vacuuming                       | 2         | 2  | Specific Activity Impairment |
| Difficulty painting a picture              | 2         | 2  | Specific Activity Impairment |
| Difficulty cutting the lawn                | 2         | 2  | Specific Activity Impairment |
| Difficulty tying shoes                     | 2         | 2  | Specific Activity Impairment |
| Can't walk in snow                         | 2         | 2  | Specific Activity Impairment |
| Difficulty biking                          | 2         | 2  | Specific Activity Impairment |
| Difficulty turning pages                   | 1         | 1  | Specific Activity Impairment |
| Decreased ability to use hand tools        | 1         | 1  | Specific Activity Impairment |
| Trouble holding a piece of paper           | 1         | 1  | Specific Activity Impairment |
| Difficulty using scissors                  | 1         | 1  | Specific Activity Impairment |
| Difficulty doing laundry                   | 1         | 1  | Specific Activity Impairment |
| Difficulty using a step ladder             | 1         | 1  | Specific Activity Impairment |
| Difficulty shoveling                       | 1         | 1  | Specific Activity Impairment |
| Difficulty using a hammer                  | 1         | 1  | Specific Activity Impairment |
| Difficulty cutting objects                 | 1         | 1  | Specific Activity Impairment |
| Difficulty using utensils                  | 1         | 1  | Specific Activity Impairment |
| Difficulty washing dishes                  | 1         | 1  | Specific Activity Impairment |
| Difficulty hiking                          | 1         | 1  | Specific Activity Impairment |
| Difficulty operating a motor vehicle       | 1         | 1  | Specific Activity Impairment |
| Difficulty preparing food                  | 1         | 1  | Specific Activity Impairment |
| Difficulty skiing                          | 1         | 1  | Specific Activity Impairment |
| Difficulty gardening                       | 1         | 1  | Specific Activity Impairment |
| Difficulty using a lighter                 | 1         | 1  | Specific Activity Impairment |
| Difficulty golfing                         | 1         | 1  | Specific Activity Impairment |
| <b>Subtotal for theme</b>                  | <b>98</b> |    |                              |
|                                            |           |    |                              |
| Balance problems                           | 19        | 12 | Balance Impairment           |
| Problems standing in the shower            | 3         | 3  | Balance Impairment           |
| Impaired coordination                      | 2         | 2  | Balance Impairment           |
| Difficulty walking with objects            | 2         | 2  | Balance Impairment           |
| <b>Subtotal for theme</b>                  | <b>26</b> |    |                              |
|                                            |           |    |                              |
| General fatigue                            | 10        | 7  | Fatigue                      |
| Fatigue when walking distances             | 4         | 2  | Fatigue                      |
| Muscle aching with activity                | 1         | 1  | Fatigue                      |
| The need for prolonged recovery time       | 1         | 1  | Fatigue                      |
| Muscle fatigue                             | 1         | 1  | Fatigue                      |
| <b>Subtotal for theme</b>                  | <b>17</b> |    |                              |

|                                     |           |   |                                |
|-------------------------------------|-----------|---|--------------------------------|
|                                     |           |   |                                |
| Cramps                              | 7         | 7 | Pain                           |
| Leg pain                            | 4         | 3 | Pain                           |
| Foot pain                           | 4         | 3 | Pain                           |
| Back pain                           | 3         | 3 | Pain                           |
| Pain when walking                   | 3         | 2 | Pain                           |
| Diffuse pain                        | 2         | 2 | Pain                           |
| Joint stiffness                     | 2         | 2 | Pain                           |
| Calf pain                           | 2         | 2 | Pain                           |
| Muscle stiffness                    | 2         | 2 | Pain                           |
| Burning pain with cold weather      | 2         | 1 | Pain                           |
| Pain with orthotic use              | 1         | 1 | Pain                           |
| Burning pain                        | 1         | 1 | Pain                           |
| Lack of flexibility                 | 1         | 1 | Pain                           |
| Pain in feet when standing up       | 1         | 1 | Pain                           |
| Shoulder pain                       | 1         | 1 | Pain                           |
| Muscle spasms                       | 1         | 1 | Pain                           |
| <b>Subtotal for theme</b>           | <b>37</b> |   |                                |
|                                     |           |   |                                |
| Restless legs                       | 3         | 2 | Sleep Disturbance              |
| Sleep apnea                         | 1         | 1 | Sleep Disturbance              |
| <b>Subtotal for theme</b>           | <b>4</b>  |   |                                |
|                                     |           |   |                                |
| Foot numbness                       | 6         | 4 | Numbness                       |
| Numb feet with cold weather         | 4         | 3 | Numbness                       |
| Numbness                            | 3         | 2 | Numbness                       |
| Burns or injuries due to numbness   | 3         | 3 | Numbness                       |
| Hand numbness                       | 2         | 2 | Numbness                       |
| Leg numbness                        | 2         | 2 | Numbness                       |
| Problems knowing where legs are     | 1         | 1 | Numbness                       |
| Tingling                            | 1         | 1 | Numbness                       |
| Unable to feel temperature of water | 1         | 1 | Numbness                       |
| Cold feet                           | 1         | 1 | Numbness                       |
| Calf numbness                       | 1         | 1 | Numbness                       |
| <b>Subtotal for theme</b>           | <b>25</b> |   |                                |
|                                     |           |   |                                |
| Hearing loss                        | 3         | 3 | Central Sensory Impairment     |
| Conversational hearing impairment   | 2         | 2 | Central Sensory Impairment     |
| Can't hear high pitches             | 1         | 1 | Central Sensory Impairment     |
| Difficulty with depth perception    | 1         | 1 | Central Sensory Impairment     |
| <b>Subtotal for theme</b>           | <b>7</b>  |   |                                |
|                                     |           |   |                                |
| Heartburn                           | 3         | 3 | Gastrointestinal Issues        |
| Constipation                        | 3         | 3 | Gastrointestinal Issues        |
| <b>Subtotal for theme</b>           | <b>6</b>  |   |                                |
|                                     |           |   |                                |
| Trouble swallowing liquids          | 2         | 2 | Problems Swallowing or Choking |
| Trouble swallowing                  | 1         | 1 | Problems Swallowing or Choking |

|                                         |          |   |                |
|-----------------------------------------|----------|---|----------------|
| <b>Subtotal for theme</b>               | <b>3</b> |   |                |
|                                         |          |   |                |
| Regret over passing disease to children | 3        | 3 | Genetic Issues |
| Fear of passing disease onto children   | 2        | 2 | Genetic Issues |
| Difficulty with childbirth              | 1        | 1 | Genetic Issues |
| <b>Subtotal for theme</b>               | <b>6</b> |   |                |
|                                         |          |   |                |
| Total Quotes                            | 660      |   |                |
| Total Number of Identified Symptoms     | 145      |   |                |
